# Supplementary material for: Scribable multi-walled carbon nanotube-silicon nanocomposites: a viable lithium-ion battery system
Source: Royal Society of Chemistry journal article supplement (doi:10.1039/c4nr04288c), 2015-01-01

## Supporting Information

### Scribable Multi-walled Carbon Nanotube-Silicon Nanocomposite: A Viable Lithium-Ion Battery System

Rigved Epur<sup>1</sup>, Madhumati Ramanathan<sup>2</sup>, Moni K. Datta<sup>2</sup>, Prashanth H. Jampani<sup>2</sup>, Bharat Gattu<sup>3</sup>,  
and Prashant N. Kumta<sup>1,2,3,4,†</sup>

<sup>1</sup>Department of Mechanical Engineering and Materials Science, University of Pittsburgh,  
Pittsburgh, PA 15261 – USA

<sup>2</sup>Department of Bioengineering, University of Pittsburgh, Pittsburgh, PA 15261 – USA

<sup>3</sup>Department of Chemical and Petroleum Engineering, University of Pittsburgh, Pittsburgh, PA  
15261 – USA

<sup>4</sup>Center for Complex Engineered Multifunctional Materials, University of Pittsburgh, Pittsburgh,  
PA 15261 – USA

Figure-S2: TGA plot of CNT/Si heterostructures performed in air from 25°C to 1000°C at a heating rate of 10°C/min

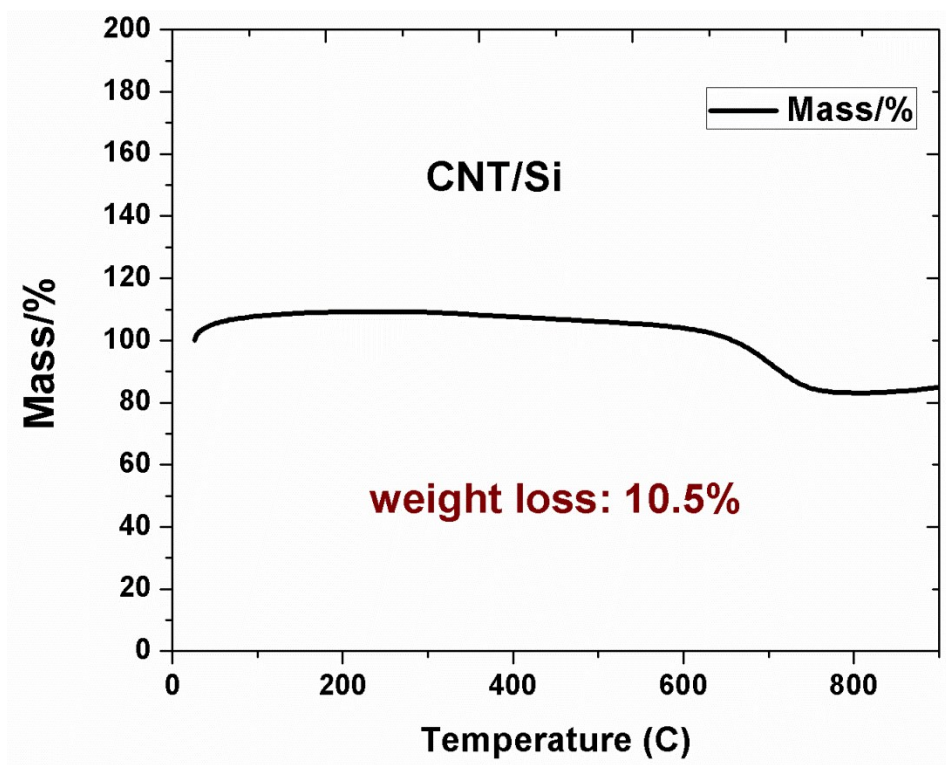

Supplement: c4nr04288c1.pdf [file c4nr04288c1.pdf]
